# Supplementary material for: Vascular smooth muscle TRPC3 channels facilitate the inverse hemodynamic response during status epilepticus
Source: PubMed Central journal article supplement (PMC6972937; doi:10.1038/s41598-020-57733-0), 2020-01-21

**Vascular smooth muscle TRPC3 channels facilitate the inverse hemodynamic response during status epilepticus**

Michael A. Cozart,<sup>1\*</sup> Kevin D. Phelan,<sup>2</sup> Hong Wu,<sup>1</sup> Shengyu Mu,<sup>1</sup> Lutz Birnbaumer,<sup>3,4</sup> Nancy J. Rusch,<sup>1</sup> Fang Zheng<sup>1</sup>

<sup>1</sup>Department of Pharmacology and Toxicology, <sup>2</sup>Department of Neurobiology and Developmental Sciences, University of Arkansas for Medical Sciences, Little Rock, Arkansas, United States of America

<sup>3</sup>Neurobiology Laboratory, National Institute of Environmental Sciences, Research Triangle Park, North Carolina, United States of America

<sup>4</sup>Institute of Biomedical Research (BIOMED), School of Medical Sciences, Catholic University of Argentina, Buenos Aires, Argentina.

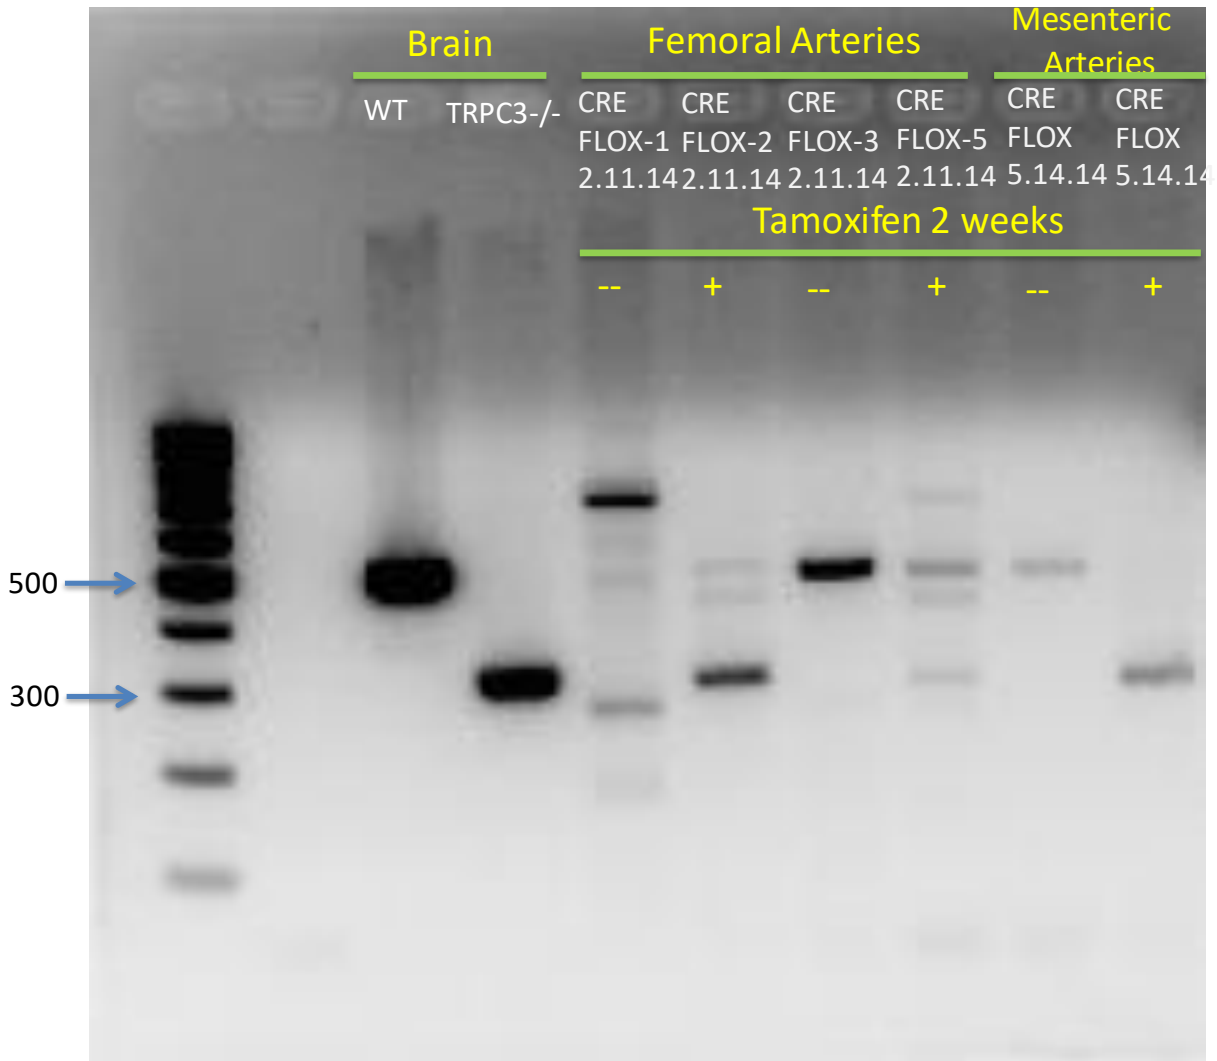

Supplement: 41598_2020_57733_MOESM1_ESM.pdf [file 41598_2020_57733_MOESM1_ESM.pdf]
